# Supplementary material
Source: PubMed Central journal article supplement (PMC8881002)
Supplement: NIHMS1779673-supplement-Supplementary_Material.pdf [file NIHMS1779673-supplement-Supplementary_Material.pdf]

## Supplementary Material

Title: Synthesis, kinetic evaluation and molecular docking studies of donepezil-based acetylcholinesterase inhibitors

Makar Makarian<sup>1</sup>, Michael Gonzalez<sup>1</sup>, Stephanie M. Salvador<sup>1</sup>, Shahrokh Lorzadeh,<sup>2</sup> Paula K. Hudson<sup>1</sup>, Stevan Pecic<sup>1</sup>

<sup>1</sup>Department of Chemistry & Biochemistry, California State University, Fullerton, USA.

<sup>2</sup>Department of Human Anatomy and Cell Science, Rady Faculty of Health Sciences, Max Rady College of Medicine, University of Manitoba, Winnipeg, MB R3E 0J9, Canada.

### Proton and Carbon NMR spectra Analogs 1-12

|                                                                                                                          | Page |
|--------------------------------------------------------------------------------------------------------------------------|------|
| 5,6-dimethoxy-2-((1-(pyridin-2-ylmethyl)piperidin-4-yl)methyl)-2,3-dihydro-1H-inden-1-one, <b>Analog 1</b>               | 2    |
| 5,6-dimethoxy-2-((1-(pyridin-3-ylmethyl)piperidin-4-yl)methyl)-2,3-dihydro-1H-inden-1-one, <b>Analog 2</b>               | 3    |
| 5,6-dimethoxy-2-((1-(pyridin-4-ylmethyl)piperidin-4-yl)methyl)-2,3-dihydro-1H-inden-1-one, <b>Analog 3</b>               | 4    |
| 5,6-dimethoxy-2-((1-(quinolin-4-ylmethyl)piperidin-4-yl)methyl)-2,3-dihydro-1H-inden-1-one, <b>Analog 4</b>              | 5    |
| 2-((1-((2-chloropyridin-4-yl)methyl)piperidin-4-yl)methyl)-5,6-dimethoxy-2,3-dihydro-1H-inden-1-one, <b>Analog 5</b>     | 6    |
| 2-((1-((2-bromopyridin-4-yl)methyl)piperidin-4-yl)methyl)-5,6-dimethoxy-2,3-dihydro-1H-inden-1-one, <b>Analog 6</b>      | 7    |
| 2-((1-((3-chloropyridin-4-yl)methyl)piperidin-4-yl)methyl)-5,6-dimethoxy-2,3-dihydro-1H-inden-1-one, <b>Analog 7</b>     | 8    |
| 2-((1-((3,5-dichloropyridin-4-yl)methyl)piperidin-4-yl)methyl)-5,6-dimethoxy-2,3-dihydro-1H-inden-1-one, <b>Analog 8</b> | 9    |
| 2-((1-((2-fluoropyridin-3-yl)methyl)piperidin-4-yl)methyl)-5,6-dimethoxy-2,3-dihydro-1H-inden-1-one, <b>Analog 9</b>     | 10   |
| 2-((1-((2-chloropyridin-3-yl)methyl)piperidin-4-yl)methyl)-5,6-dimethoxy-2,3-dihydro-1H-inden-1-one, <b>Analog 10</b>    | 11   |
| 2-((1-((2-bromopyridin-3-yl)methyl)piperidin-4-yl)methyl)-5,6-dimethoxy-2,3-dihydro-1H-inden-1-one, <b>Analog 11</b>     | 12   |
| 5,6-dimethoxy-2-((1-((6-methylpyridin-3-yl)methyl)piperidin-4-yl)methyl)-2,3-dihydro-1H-inden-1-one, <b>Analog 12</b>    | 13   |
| <b>Figure S1.</b> Sequence Alignment – electric eel and human AChE enzymes                                               | 14   |

5,6-dimethoxy-2-((1-(pyridin-2-ylmethyl)piperidin-4-yl)methyl)-2,3-dihydro-1H-inden-1-one, **Analog 1**

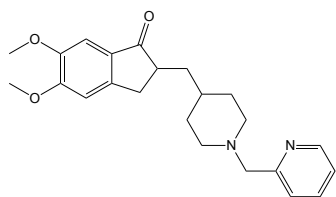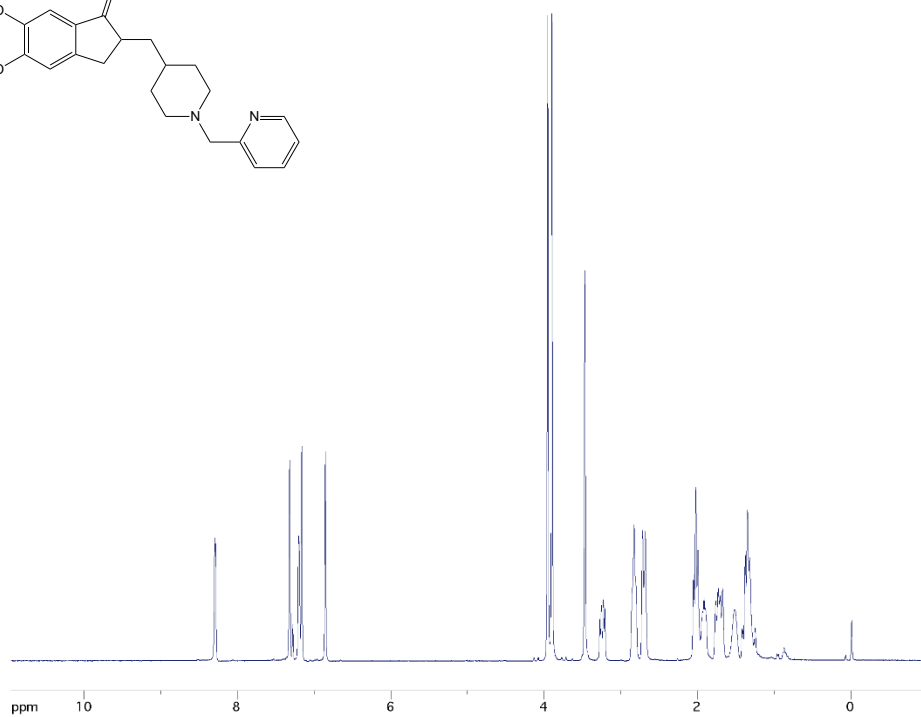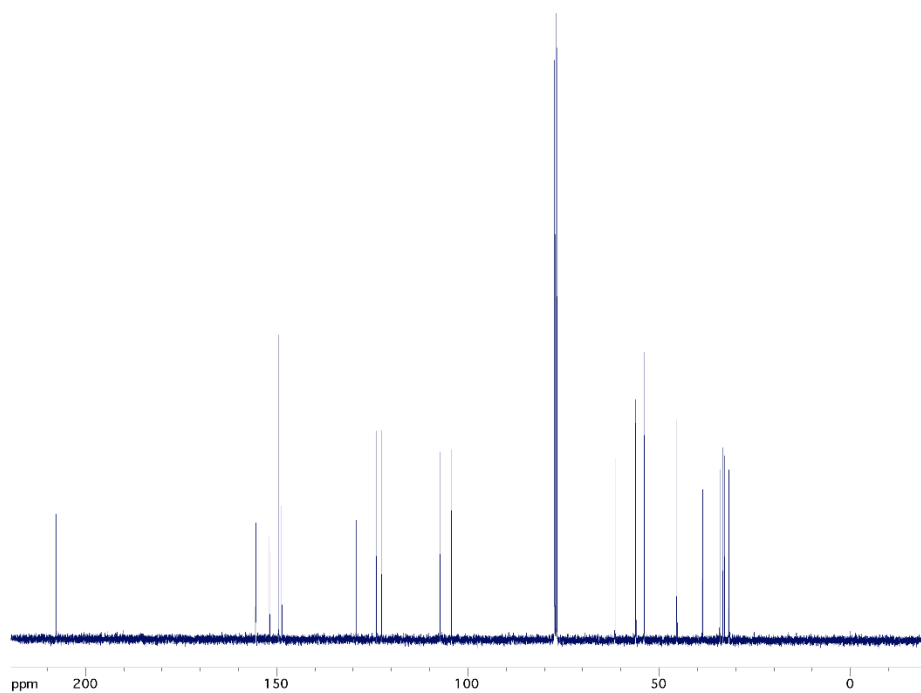

5,6-dimethoxy-2-((1-(pyridin-3-ylmethyl)piperidin-4-yl)methyl)-2,3-dihydro-1H-inden-1-one, **Analog 2**

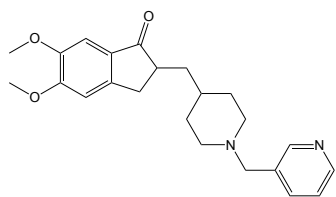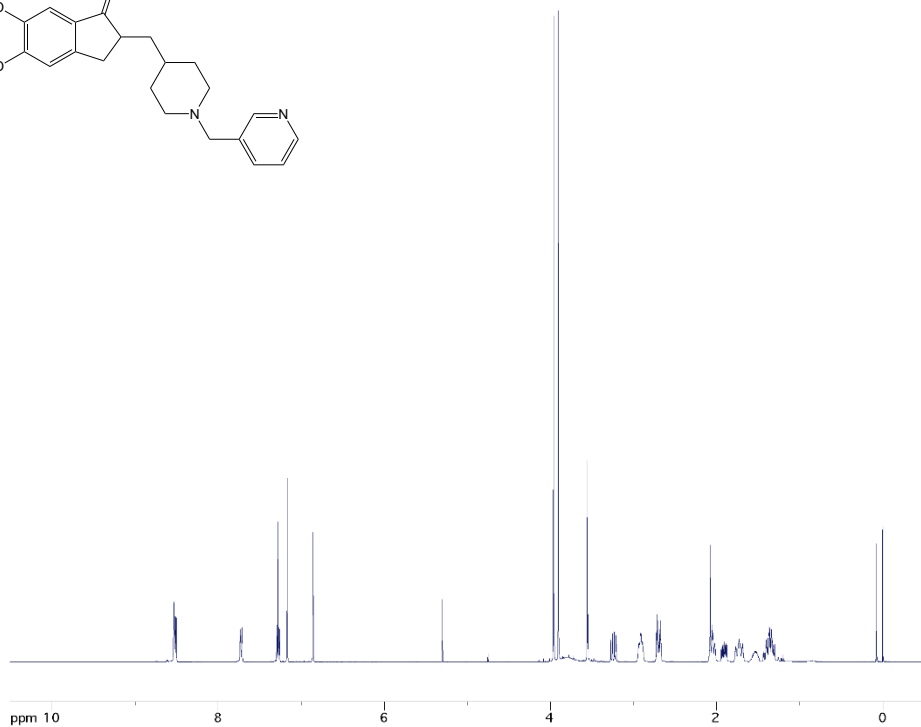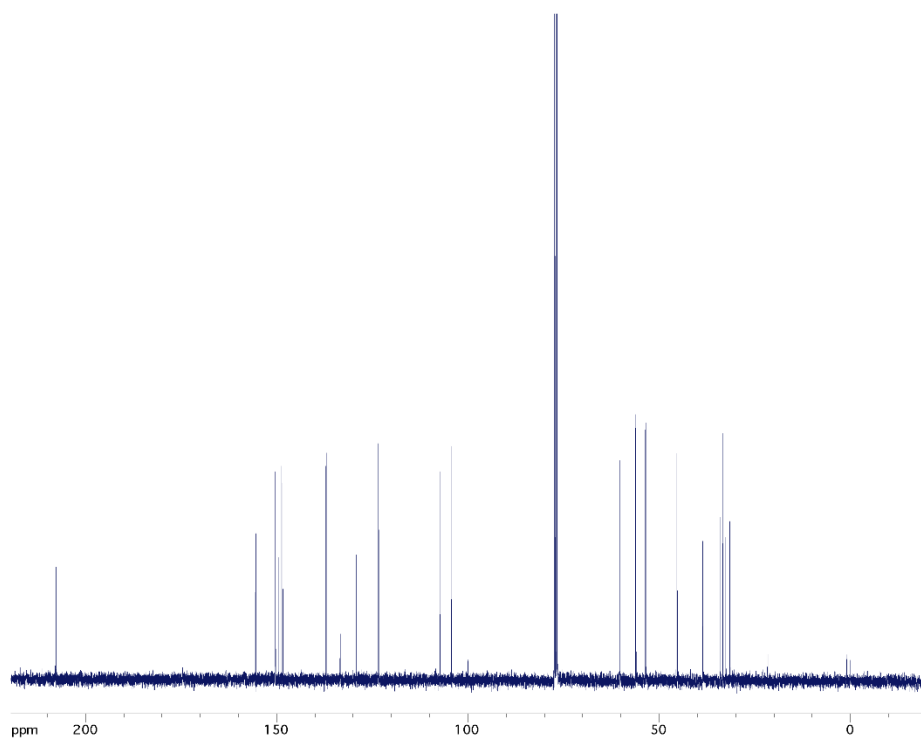

5,6-dimethoxy-2-((1-(pyridin-4-ylmethyl)piperidin-4-yl)methyl)-2,3-dihydro-1H-inden-1-one, **Analog 3**

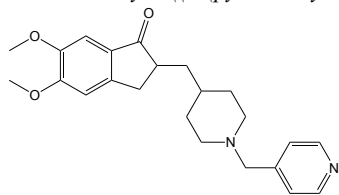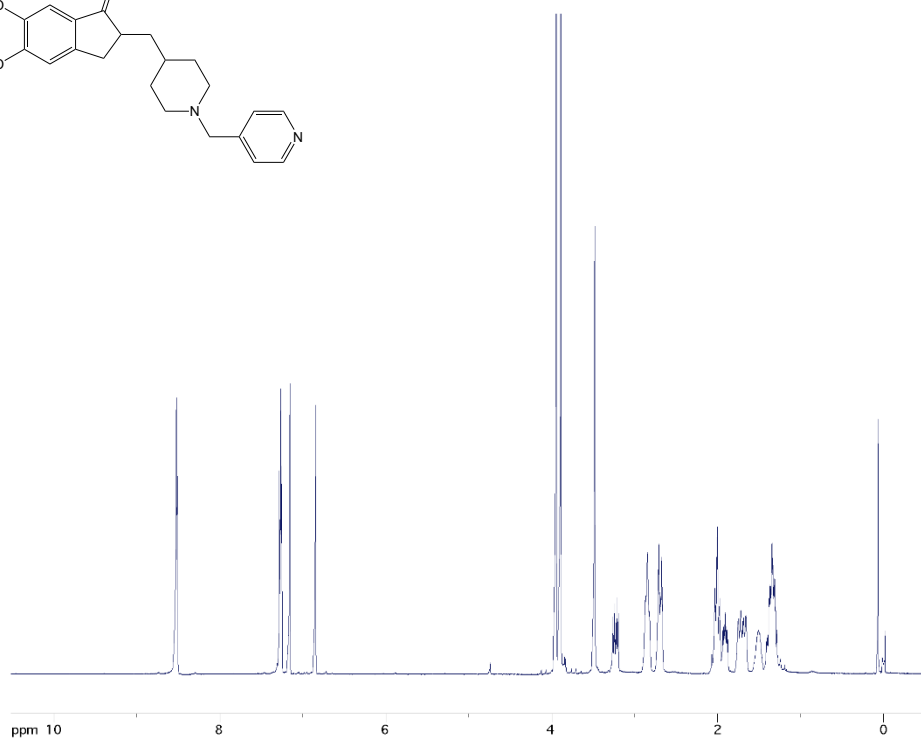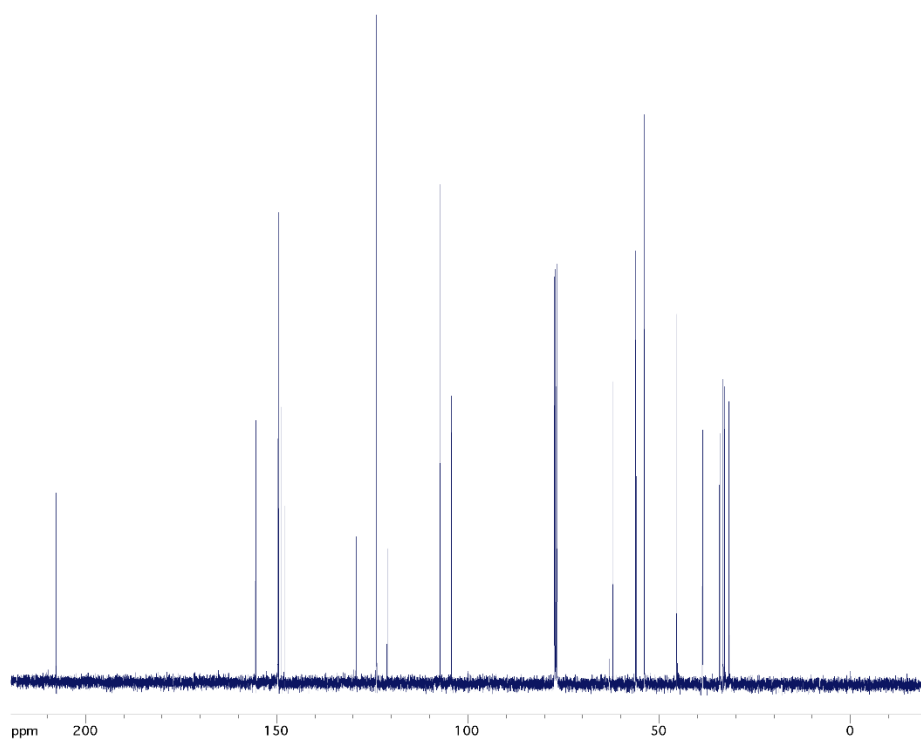

5,6-dimethoxy-2-((1-(quinolin-4-ylmethyl)piperidin-4-yl)methyl)-2,3-dihydro-1H-inden-1-one, Analog 4

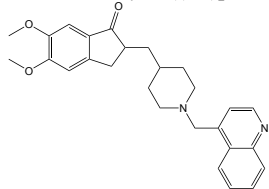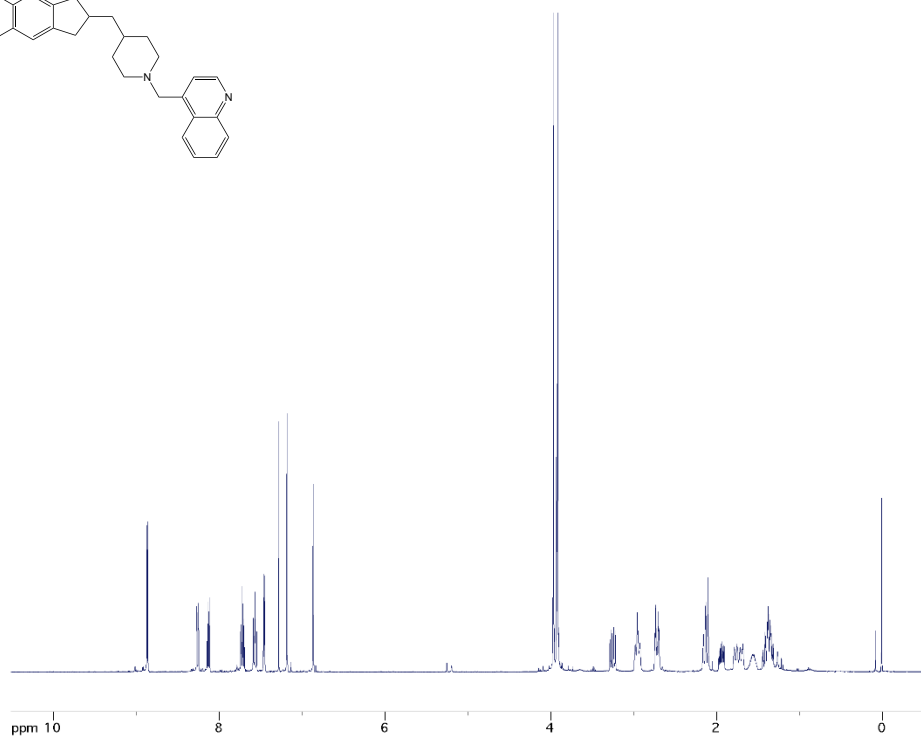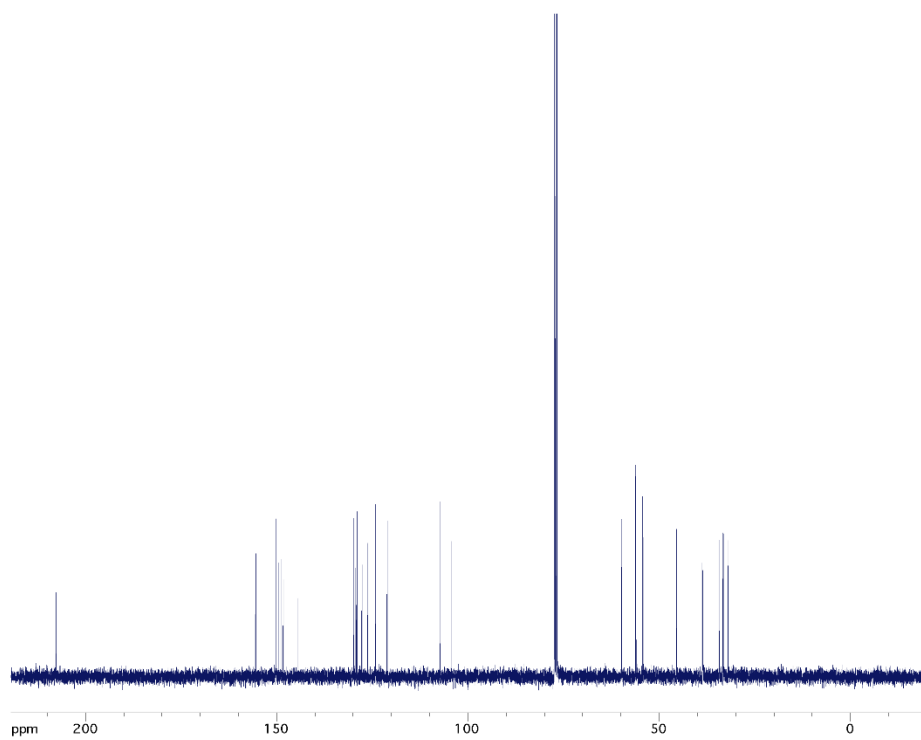

2-((1-((2-chloropyridin-4-yl)methyl)piperidin-4-yl)methyl)-5,6-dimethoxy-2,3-dihydro-1H-inden-1-one, **Analog 5**

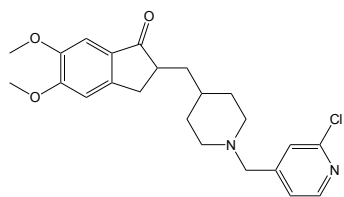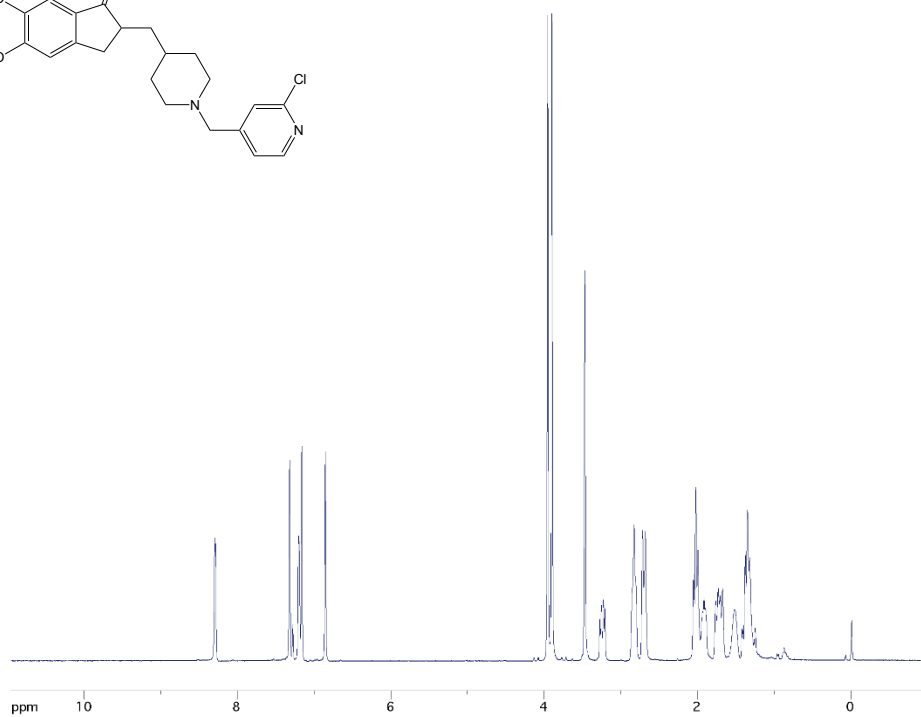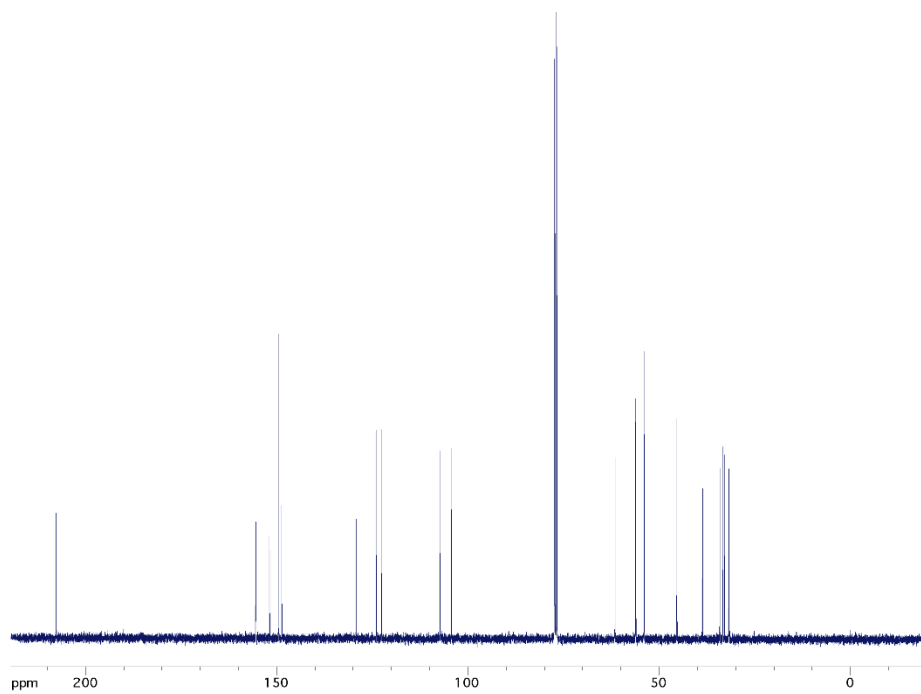

2-((1-((2-bromopyridin-4-yl)methyl)piperidin-4-yl)methyl)-5,6-dimethoxy-2,3-dihydro-1H-inden-1-one, **Analog 6**

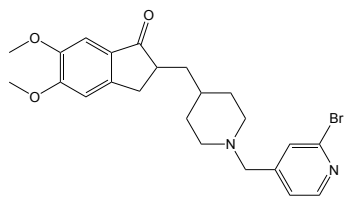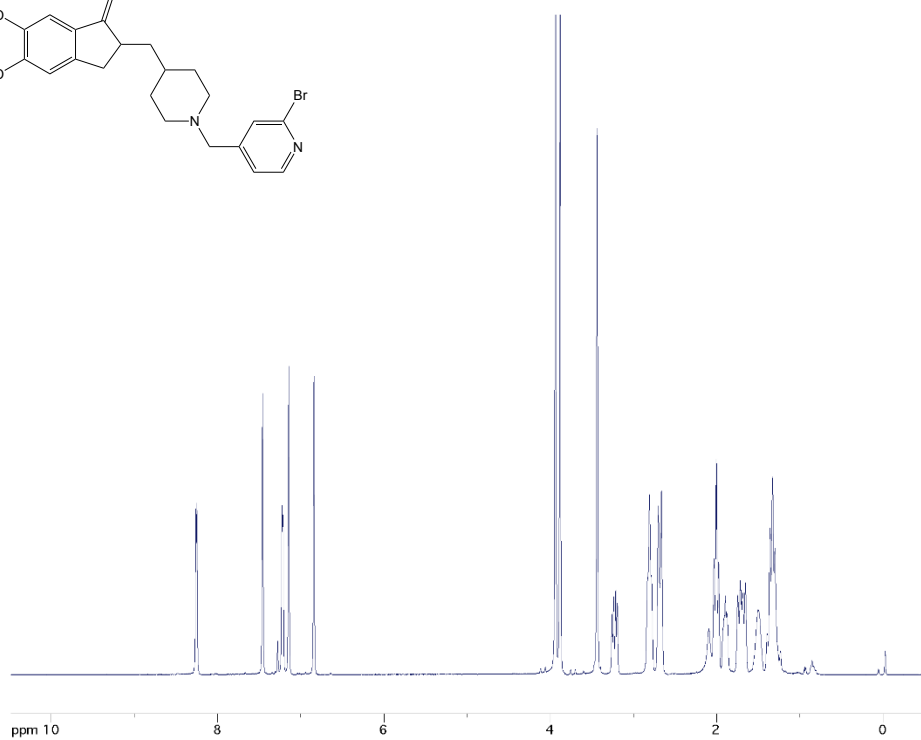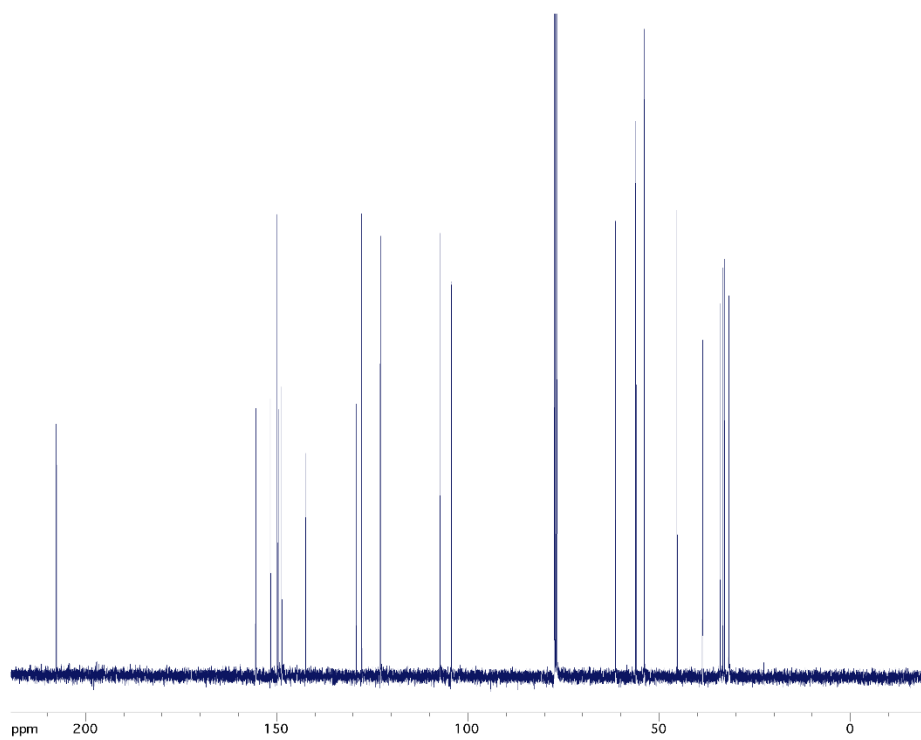

2-((1-((3-chloropyridin-4-yl)methyl)piperidin-4-yl)methyl)-5,6-dimethoxy-2,3-dihydro-1H-inden-1-one, **Analog 7**

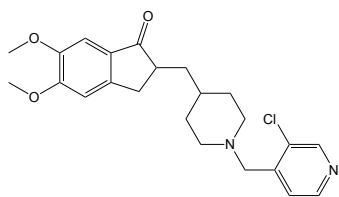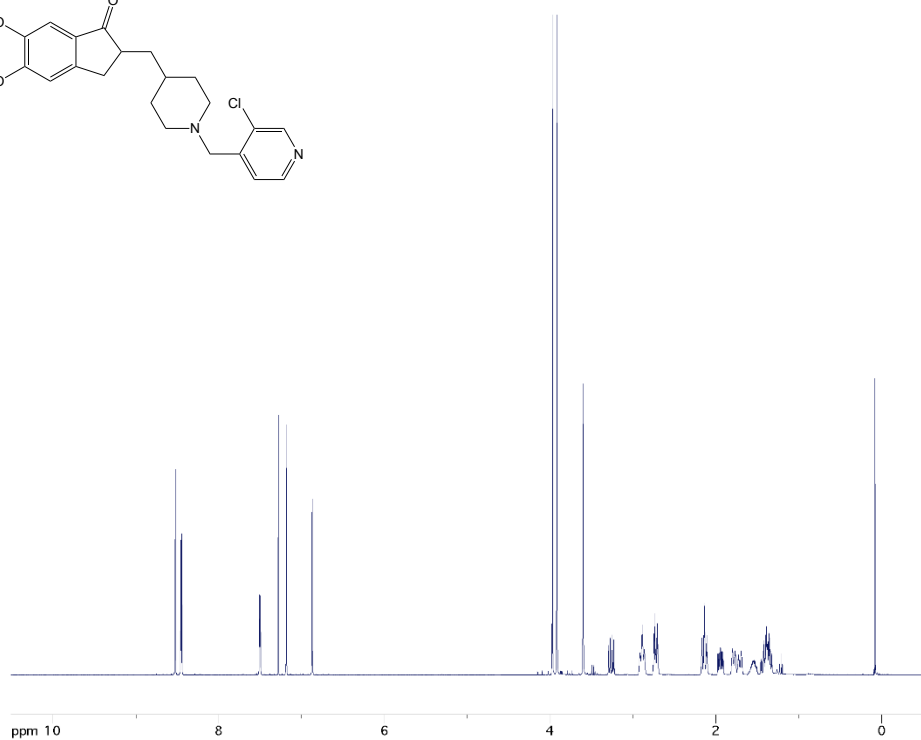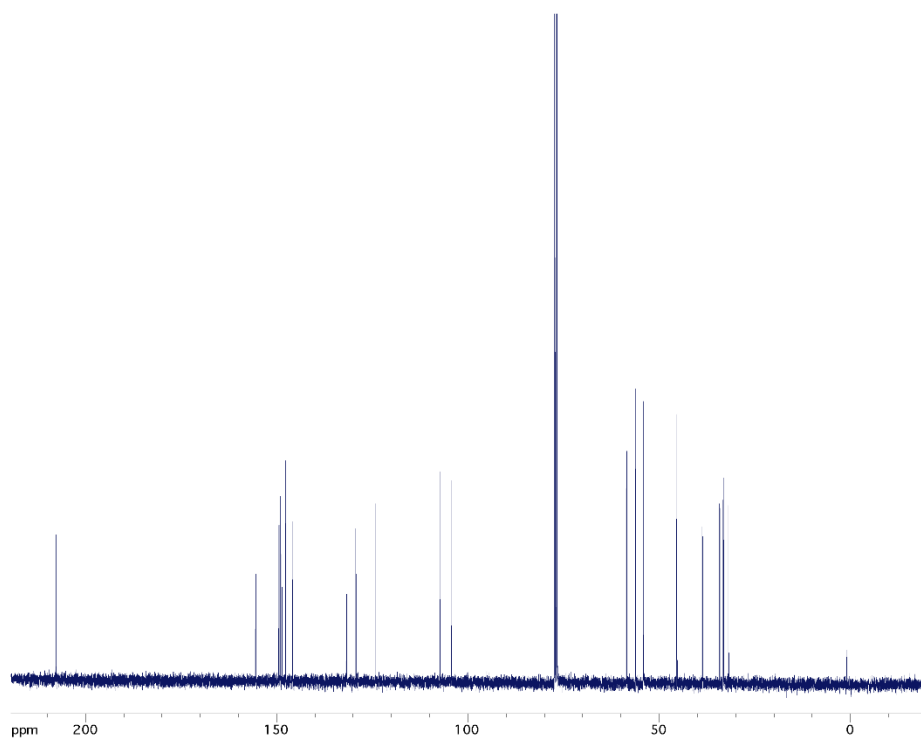



2-((1-((3,5-dichloropyridin-4-yl)methyl)piperidin-4-yl)methyl)-5,6-dimethoxy-2,3-dihydro-1H-inden-1-one, Analog 8

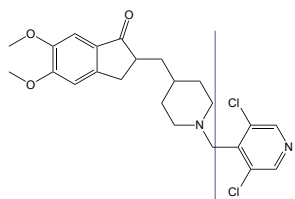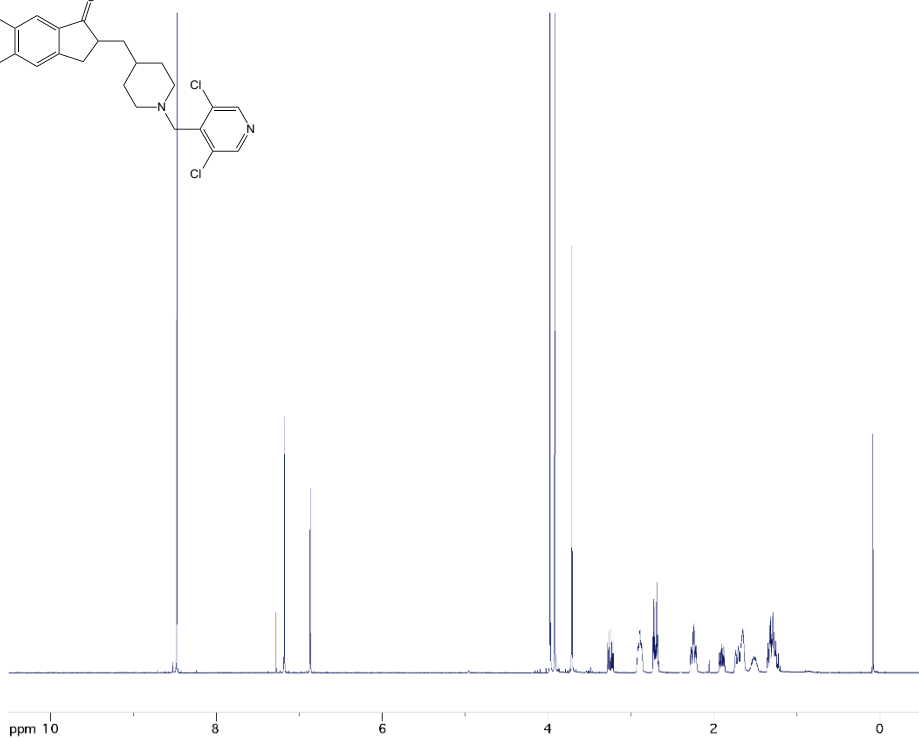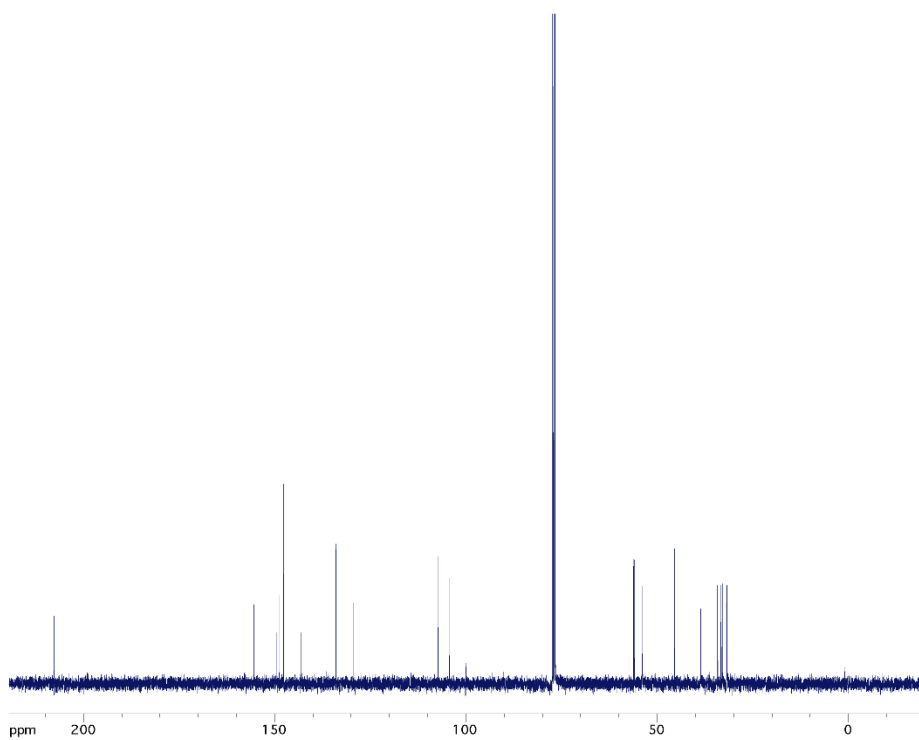

2-((1-((2-fluoropyridin-3-yl)methyl)piperidin-4-yl)methyl)-5,6-dimethoxy-2,3-dihydro-1H-inden-1-one, **Analog 9**

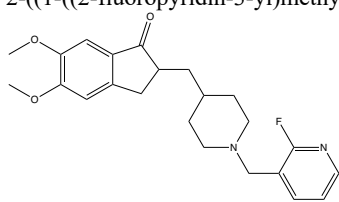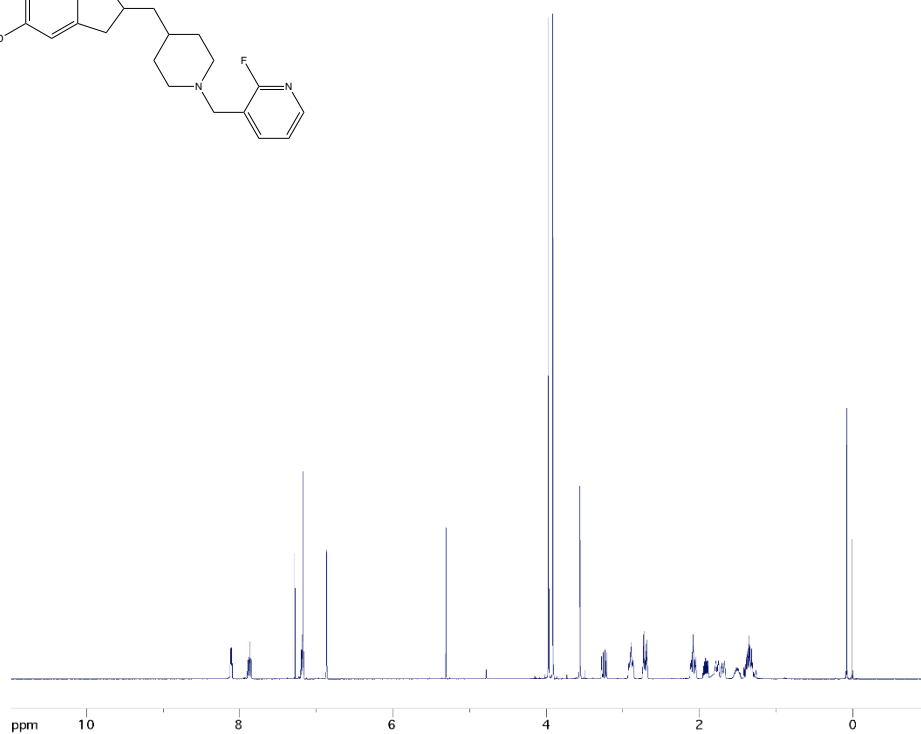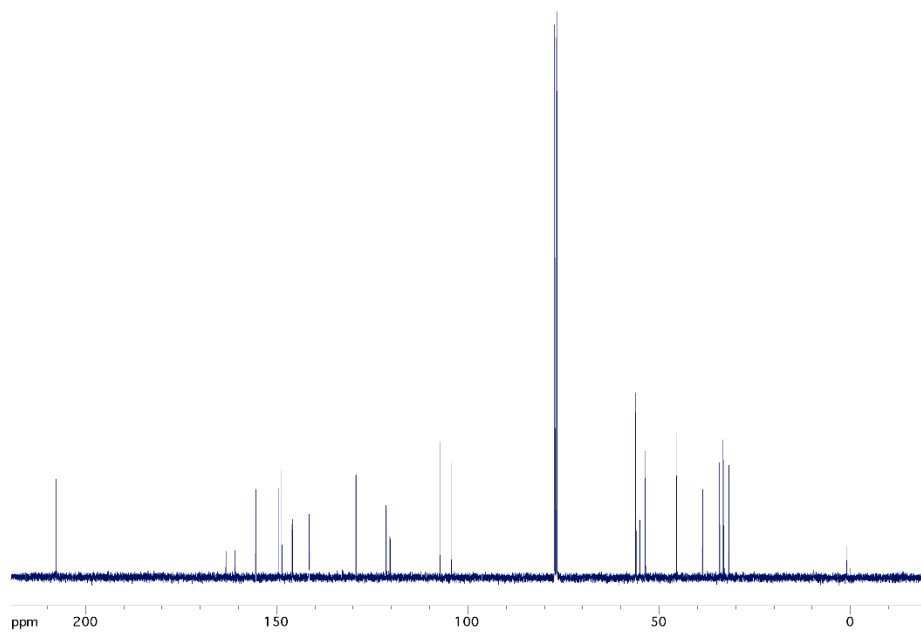

2-((1-((2-chloropyridin-3-yl)methyl)piperidin-4-yl)methyl)-5,6-dimethoxy-2,3-dihydro-1H-inden-1-one, **Analog 10**

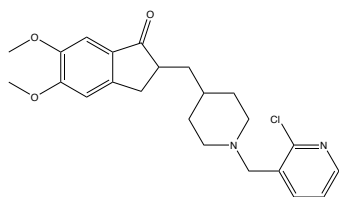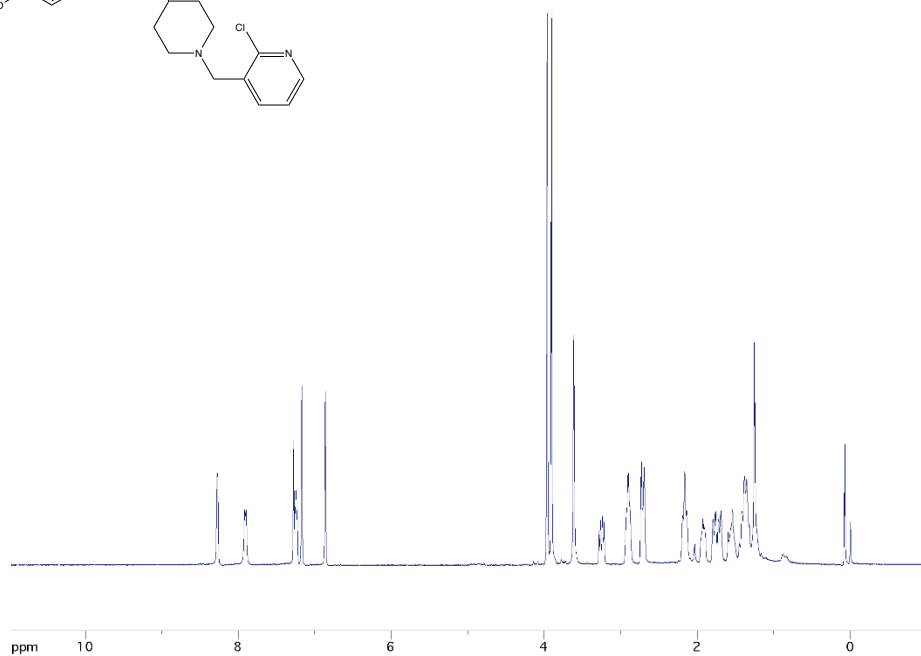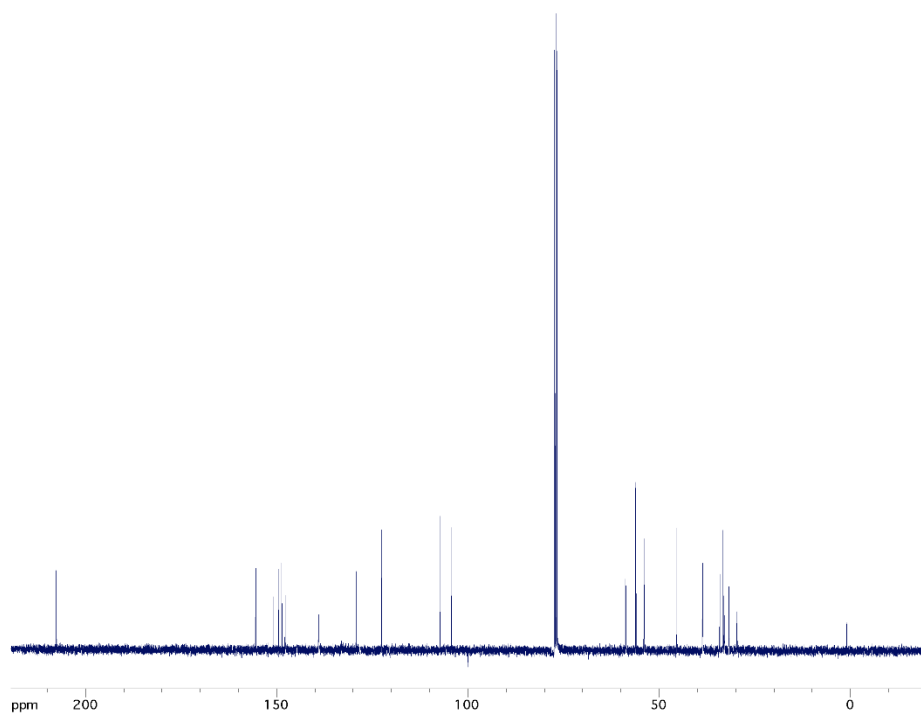

2-((1-((2-bromopyridin-3-yl)methyl)piperidin-4-yl)methyl)-5,6-dimethoxy-2,3-dihydro-1H-inden-1-one, **Analog 11**

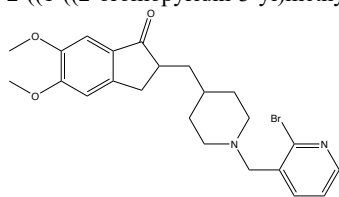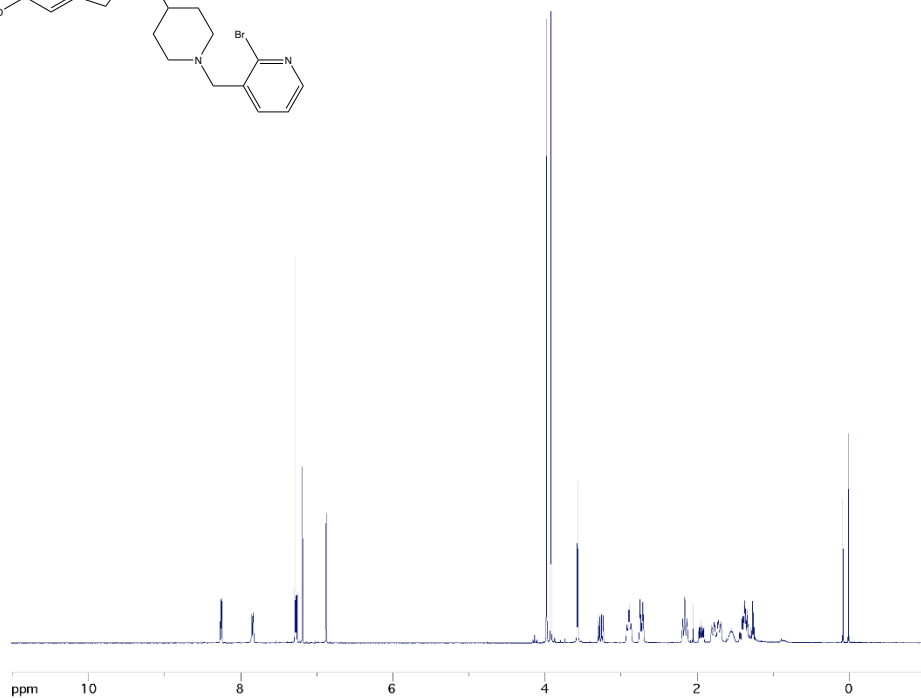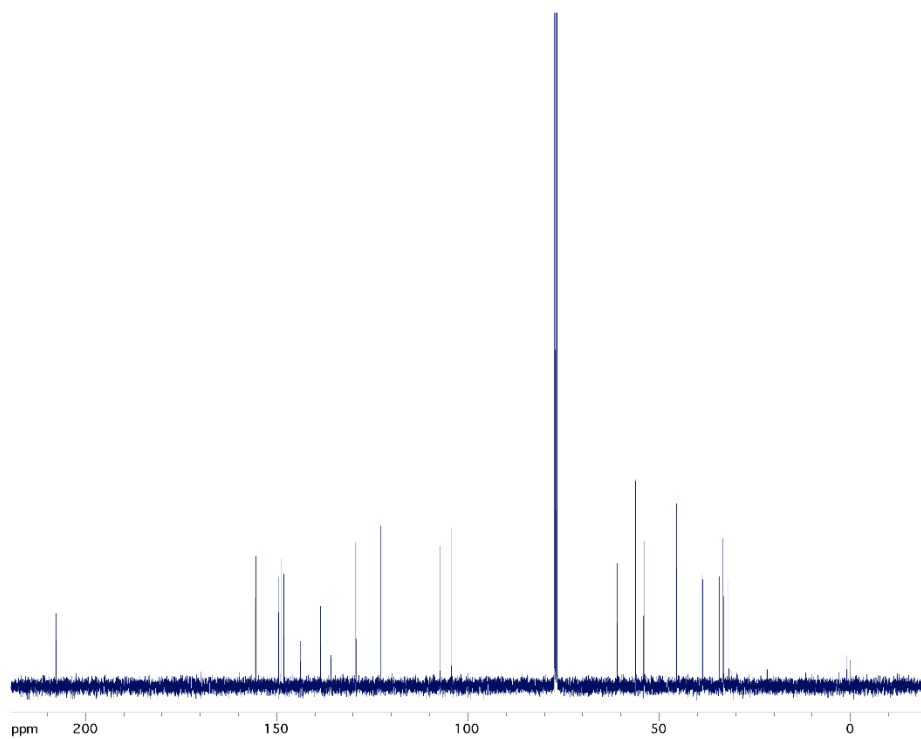

5,6-dimethoxy-2-((1-((6-methylpyridin-3-yl)methyl)piperidin-4-yl)methyl)-2,3-dihydro-1H-inden-1-one, **Analog 12**

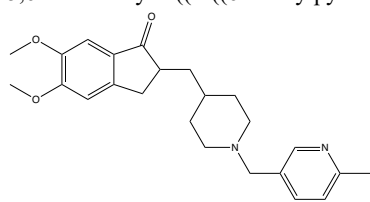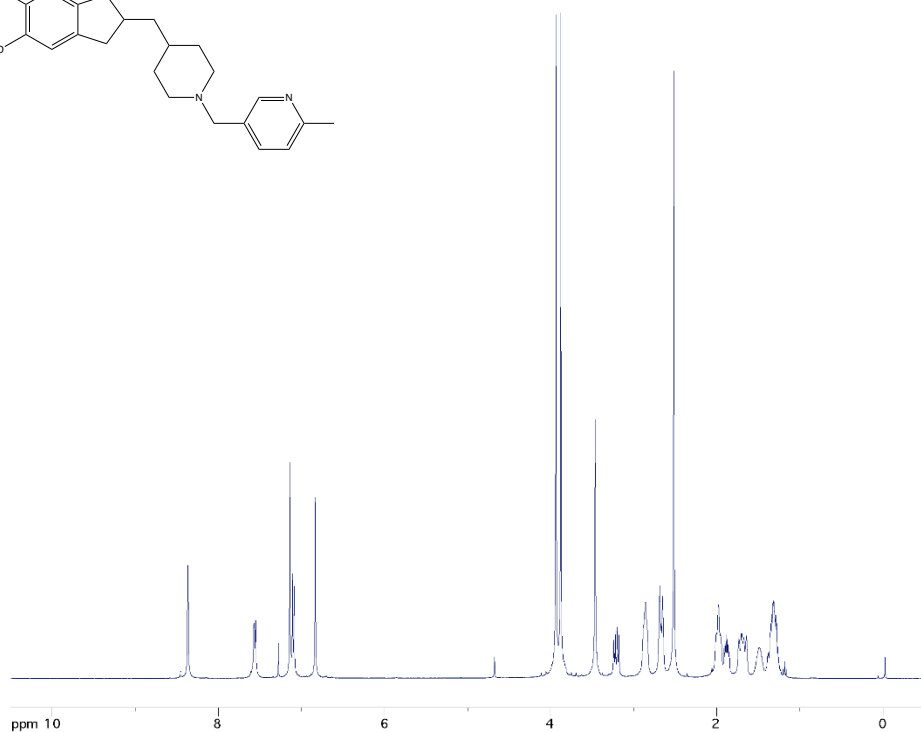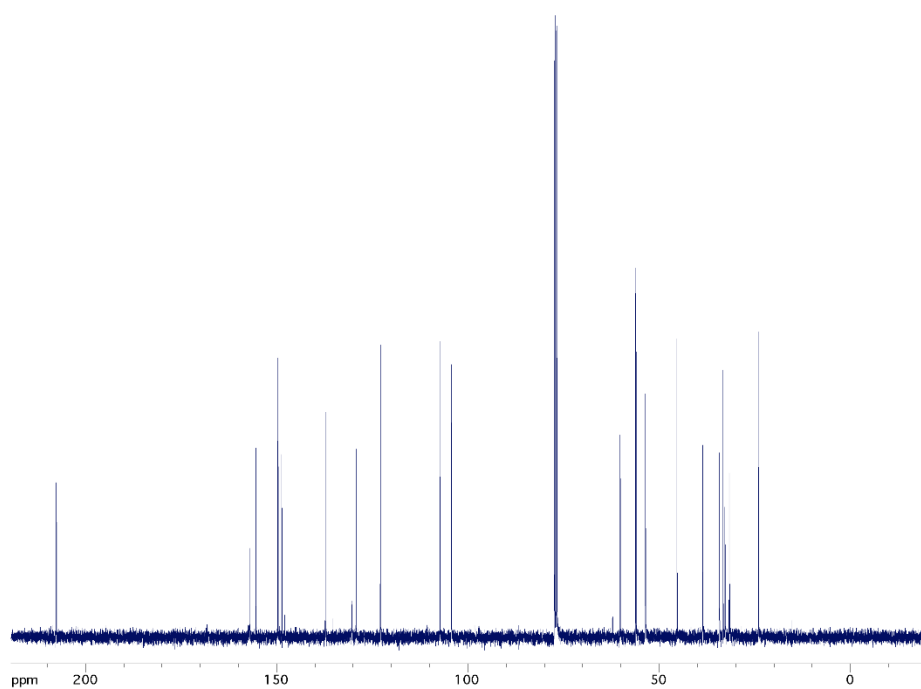

Figure S1. Sequence alignment – electric eel and human AChE enzymes

```
604 pp=57.3
sp_P22303_ACES_HUMAN 1 .....#.#.#LL#####.....DREL#..R.G.#.G.RL..P...V.AFLGIPFAEPFAG..RF.PPEPK.PW..VFDA..#S#CYQYVDT.YPGF.GTEMNPNR.#SEDCLYLNWV.P#.....VVMYGGFYSG.SSLDQYDGR#.#.E+.V#
sp_042275_ACES_ELEEL 1 -----MKILDALLFPVIFHFHLSIAQTPEELTIMTRLAGVQHTLPPVDRSHVIAELGIPFAEELGKRR#PEEERK#HVVYDAADYFAELQYVDT#FMSGTEMNPNR#SEDCLYLNWV#ATPRPHLTVVMYGGFYSG.SSLDQYDGR#LHSEKVVV
VSMNRYV.AGFLAL.GS.EAPQNVLLDQRLALQVQ-##FGG.P..VF#GESAGAASVGMHLLSP.SR..F.RA#LQSGFNGPW.TV.#.EARRRA..L..LVGCP.....GNDT-L#_CLR.#.#Q.L#.E#WLD...#FRF#FV#V#DG.##.DTPEA#N.G.F...
sp_P22303_ACES_HUMAN 178 VSMNRYV.AGFLAL.GS.EAPQNVLLDQRLALQVQVVAAGKDF#GVTI.KGSAGASVGMHLLSP.SR..F.RA#LQSGFNGPW.TV.#.EARRRA..L..LVGCP.....GNDT-L#_CLR.#.#Q.L#.E#WLD...#FRF#FV#V#DG.##.DTPEA#N.G.F...
sp_042275_ACES_ELEEL 169 VSMNRYV.AGFLAL.GS.EAPQNVLLDQRLALQVQVVAAGKDF#GVTI.KGSAGASVGMHLLSP.SR..F.RA#LQSGFNGPW.TV.#.EARRRA..L..LVGCP.....GNDT-L#_CLR.#.#Q.L#.E#WLD...#FRF#FV#V#DG.##.DTPEA#N.G.F...
Q#I#GV...EGSYPL#YGAPF#KONESLI.R.-FL.GV+#.VP.#.#.#EAV#L.YTDW#...-D#*.REA#.#D#GDNHVC#.#.#A.#A.....#.#.VY#F#-HRAS.L.WP.#MGV#HGIEF#FG#PL...NYT#EE.#.#
sp_P22303_ACES_HUMAN 356 QVIVGVKDEGSYPL#YGAPF#KONESLI#RAE#LAGRVGV#OVSDLA#EAV#E#D#L#P#E#ARL#EALS#V#GDNHVC#.#.#A.#A.....#.#.VY#F#-HRAS.L.WP.#MGV#HGIEF#FG#PL...NYT#EE.#.#
sp_042275_ACES_ELEEL 343 QVIVGVKDEGSYPL#YGAPF#KONESLI#RED#L#G#V#S#Y#HANEIGLEAV#L#E#D#EDEN#IK#RE#D#I#GDNHVC#.#.#A.#A.....#.#.VY#F#-HRAS.L.WP.#MGV#HGIEF#FG#PL...NYT#EE.#.#
R#M+YWANFARTG.PN...D.....N#F#T...Q.#V.L...L.V.+GL+.#Q#F#N#R#P+L#L.#T.#D-AERONKAE#F#H#S#Y#F#H#K#N#Q#F#H#Y#K#Q-RC..L#
sp_P22303_ACES_HUMAN 505 R#M+YWANFARTG.PN...D.....N#F#T...Q.#V.L...L.V.+GL+.#Q#F#N#R#P+L#L.#T.#D-AERONKAE#F#H#S#Y#F#H#K#N#Q#F#H#Y#K#Q-RC..L#
sp_042275_ACES_ELEEL 521 R#M+YWANFARTG.PN...D.....N#F#T...Q.#V.L...L.V.+GL+.#Q#F#N#R#P+L#L.#T.#D-AERONKAE#F#H#S#Y#F#H#K#N#Q#F#H#Y#K#Q-RC..L#
```
